# Supplementary material
Source: PubMed Central journal article supplement (PMC6591584)

**Table S1. Metadata and *in silico* characterization of sequenced IncI1-I $\gamma$  plasmids analyzed in the present study from (A) Colombian poultry, (B) GenBank and (C) previous publications from Europe.**

**(A) IncI1-I $\gamma$  plasmids from Colombian poultry**

| Source    | Year | Plasmid Name <sup>a,b</sup> | Colombian Department of Origin | ENA Accession Number | ESBL/pAmpC Enzymes | IncI1 pMLST <sub>c,d,e,f</sub> | Bacterial Host                  | Bacterial Host MLST |
|-----------|------|-----------------------------|--------------------------------|----------------------|--------------------|--------------------------------|---------------------------------|---------------------|
| Farm      | 2008 | pSSXXXV.4.C1 <sup>a</sup>   | Santander                      | ERS2017899           | CMY-2              | 12                             | <i>S. Paratyphi</i> B var. Java | 28                  |
| Farm      | 2008 | pSSIII.4.C2 <sup>a</sup>    | Santander                      | ERS2017900           | CMY-2              | 12                             | <i>S. Paratyphi</i> B var. Java | 28                  |
| Farm      | 2008 | pSXXI.1.C5                  | Cundinamarca                   | ERS2017901           | CMY-2              | 12                             | <i>S. Paratyphi</i> B var. Java | 28                  |
| Farm      | 2008 | pECSLV.10.C1                | Santander                      | ERS2893249           | SHV-12             | Non-typeable <sup>c,d</sup>    | <i>E. coli</i>                  | 366                 |
| Farm      | 2008 | pECSXXXIV.1.C               | Santander                      | ERS2893250           | CMY-2              | 12                             | <i>E. coli</i>                  | 57                  |
| Farm      | 2009 | pEC4.5                      | Cundinamarca                   | ERS2893251           | CMY-2              | 12                             | <i>E. coli</i>                  | 101                 |
| Slaughter | 2012 | pFBOG8                      | Bogotá                         | ERS2017931           | CMY-2              | 12                             | <i>S. Paratyphi</i> B var. Java | 28                  |
| Slaughter | 2012 | pFBOG7 <sup>b</sup>         | Bogotá                         | ERS2017938           | CMY-2              | Non-typeable <sup>c,e</sup>    | <i>S. Paratyphi</i> B var. Java | 28                  |
| Slaughter | 2013 | pFSUC414                    | Sucre                          | ERS2017932           | CMY-2              | 12                             | <i>S. Heidelberg</i>            | 15                  |
| Slaughter | 2013 | pFCAR509                    | Bolívar                        | ERS2017933           | CMY-2              | 12                             | <i>S. Heidelberg</i>            | 15                  |
| Slaughter | 2013 | pFANT596                    | Antioquia                      | ERS2017934           | CMY-2              | 12                             | <i>S. Paratyphi</i> B var. Java | 28                  |
| Slaughter | 2013 | pFVAL369                    | Valle del Cauca                | ERS2017937           | CMY-2              | 12                             | <i>S. Heidelberg</i>            | 15                  |
| Slaughter | 2013 | pFPAS506                    | Nariño                         | ERS2017939           | CMY-2              | 12                             | <i>S. Heidelberg</i>            | 15                  |
| Slaughter | 2008 | pECSIIL.18.C2               | Santander                      | ERS2893252           | SHV-12             | 12                             | <i>E. coli</i>                  | 3107                |
| Slaughter | 2008 | pECSLII.8.C3                | Santander                      | ERS2893253           | CMY-2              | 12                             | <i>E. coli</i>                  | 155                 |
| Slaughter | 2008 | pECSLIV.27.C2               | Santander                      | ERS2893254           | CMY-2              | 12                             | <i>E. coli</i>                  | 10                  |
| Slaughter | 2008 | pECSLIV.7.C1                | Santander                      | ERS2893255           | CMY-2              | 12                             | <i>E. coli</i>                  | 3910                |
| Slaughter | 2008 | pECSVIL.11.C1               | Santander                      | ERS2893256           | CMY-2              | 12                             | <i>E. coli</i>                  | 359                 |
| Slaughter | 2008 | pECSVIL.21.C3               | Santander                      | ERS2893257           | CMY-2              | 12                             | <i>E. coli</i>                  | 212                 |
| Slaughter | 2012 | pFSAN126                    | Santander                      | ERS2893258           | CMY-2              | 231                            | <i>E. coli</i>                  | 1775                |
| Retail    | 2010 | pUGBOG4 <sup>a</sup>        | Bogotá                         | ERS2017904           | CMY-2              | 12                             | <i>S. Paratyphi</i> B var. Java | 28                  |
| Retail    | 2010 | pUGBOG327 <sup>a</sup>      | Bogotá                         | ERS2017909           | SHV-12             | 231                            | <i>S. Paratyphi</i> B var. Java | 28                  |
| Retail    | 2010 | pUGBOG339                   | Bogotá                         | ERS2017910           | SHV-12             | 231                            | <i>S. Paratyphi</i> B var. Java | 28                  |
| Retail    | 2010 | pUGBOG340                   | Bogotá                         | ERS2017911           | SHV-12             | 231                            | <i>S. Paratyphi</i> B var. Java | 28                  |
| Retail    | 2011 | pUGBAR394                   | Atlántico                      | ERS2017912           | CMY-2              | 12                             | <i>S. Heidelberg</i>            | 15                  |
| Retail    | 2011 | pUGBAR434                   | Atlántico                      | ERS2017913           | CMY-2              | 12                             | <i>S. Albany</i>                | 292                 |
| Retail    | 2011 | pUGVAL515                   | Valle del Cauca                | ERS2017915           | CMY-2              | Non-typeable <sup>c,e</sup>    | <i>S. Heidelberg</i>            | 15                  |
| Retail    | 2011 | pUGCUC851                   | Norte de Santander             | ERS2017917           | CMY-2              | 12                             | <i>S. Paratyphi</i> B var. Java | 28                  |
| Retail    | 2011 | pUGARA888                   | Arauca                         | ERS2017919           | CMY-2              | 12                             | <i>S. Enteritidis</i>           | 11                  |
| Retail    | 2011 | pUGIBA933                   | Tolima                         | ERS2017920           | SHV-12             | 231                            | <i>S. Paratyphi</i> B var. Java | 28                  |
| Retail    | 2011 | pUGPER971                   | Risaralda                      | ERS2017921           | CMY-2              | 12                             | <i>S. Paratyphi</i> B var. Java | 28                  |
| Retail    | 2011 | pUGBOG1024                  | Bogotá                         | ERS2017922           | CMY-2              | 12                             | <i>S. Paratyphi</i> B var. Java | 28                  |
| Retail    | 2011 | pUGPAS1097                  | Nariño                         | ERS2017923           | CMY-2              | 12                             | <i>S. Kentucky</i>              | 152                 |
| Retail    | 2011 | pUGBAR1170 <sup>a</sup>     | Atlántico                      | ERS2017927           | CMY-2              | 12                             | <i>S. Paratyphi</i> B var. Java | 28                  |
| Retail    | 2009 | pEC9PP62328                 | Cundinamarca                   | ERS2893259           | SHV-12             | 230 <sup>f</sup>               | <i>E. coli</i>                  | 973                 |
| Retail    | 2010 | pUGBOG204EC                 | Cundinamarca                   | ERS2893260           | CMY-2              | 12                             | <i>E. coli</i>                  | 189                 |

|        |      |             |              |            |        |    |                |      |
|--------|------|-------------|--------------|------------|--------|----|----------------|------|
| Retail | 2010 | pUGBOG301EC | Cundinamarca | ERS2893261 | CMY-2  | 12 | <i>E. coli</i> | 201  |
| Retail | 2010 | pUGBOG304EC | Cundinamarca | ERS2893262 | SHV-12 | 26 | <i>E. coli</i> | 746  |
| Retail | 2010 | pUGBOG34EC  | Cundinamarca | ERS2893263 | CMY-2  | 12 | <i>E. coli</i> | 48   |
| Retail | 2010 | pUGVIL369EC | Meta         | ERS2893264 | CMY-2  | 12 | <i>E. coli</i> | 1049 |
| Retail | 2011 | pUGBAR389EC | Atlántico    | ERS2893265 | CMY-2  | 12 | <i>E. coli</i> | 5416 |
| Retail | 2011 | pUGBAR425EC | Atlántico    | ERS2893266 | CMY-2  | 12 | <i>E. coli</i> | 533  |
| Retail | 2011 | pUGMON457EC | Córdoba      | ERS2893267 | CMY-2  | 12 | <i>E. coli</i> | 162  |

<sup>a</sup> A plasmid from this strain carrying the ESBL/pAmpC gene was transformed into *E. coli* DH10B, sequenced and included in the phylogenetic trees as reference

<sup>b</sup> Excluded prior phylogenetic analysis due to missing sequence data

<sup>c</sup> This plasmid missed one allele from the pMLST scheme

<sup>d</sup> Single-locus variant of IncI1-I $\gamma$ /ST26, <sup>e</sup> IncI1-I $\gamma$ /ST12 or <sup>f</sup> IncI1-I $\gamma$ /ST231

### (B) IncI1-I $\gamma$ plasmids from GenBank

| Source <sup>a,b,c</sup>                      | Year <sup>c,d,e</sup>  | Plasmid Name <sup>f,g</sup> | Country of Origin <sup>c,e</sup> | GenBank Accession Number | ESBL/pAmpC Enzymes <sup>h,i</sup> | IncI1 pMLST <sup>j,k,l</sup> | Bacterial Host        | Bacterial Host MLST <sup>m</sup> |
|----------------------------------------------|------------------------|-----------------------------|----------------------------------|--------------------------|-----------------------------------|------------------------------|-----------------------|----------------------------------|
| Chicken breast meat at retail                | 2003                   | pCVM29188_101               | USA                              | CP001121.1               | CMY-2                             | 12                           | <i>S. Kentucky</i>    | N/A <sup>m</sup>                 |
| Chicken meat                                 | 2010                   | pSA02DT10168701_99          | Canada                           | CP012923.1               | CMY-2                             | 12                           | <i>S. Heidelberg</i>  | 15                               |
| Human stool                                  | 2012                   | p12-4374_96                 | Canada                           | CP012929.1               | CMY-2                             | 12                           | <i>S. Heidelberg</i>  | 15                               |
| Turkey meat                                  | 2012                   | pN13-01290_98               | Canada                           | CP012936.1               | CMY-2                             | 12                           | <i>S. Heidelberg</i>  | 15                               |
| Bovine pre-evisceration carcass              | 2005                   | pSAN1-1727                  | USA                              | CP014622.1               | - <sup>h</sup>                    | Non-typeable <sup>j,k</sup>  | <i>S. Anatum</i>      | 64                               |
| Bovine organ                                 | 2011                   | p11-004736-1-7_99           | Canada                           | CP016516.1               | CMY-2                             | 12                           | <i>S. Heidelberg</i>  | 15                               |
| Chicken meat                                 | 2009                   | pSA02DT09004001_101         | Canada                           | CP016522.1               | CMY-2                             | Non-typeable <sup>j,k</sup>  | <i>S. Heidelberg</i>  | 15                               |
| Chicken feces                                | 2013                   | pAMR588-04-00318_99         | Canada                           | CP016568.1               | CMY-2                             | 12                           | <i>S. Heidelberg</i>  | 15                               |
| Chicken feces                                | 2013                   | pAMR588-04-00320_99         | Canada                           | CP016572.1               | CMY-2                             | 12                           | <i>S. Heidelberg</i>  | 15                               |
| Human stool                                  | 2006                   | pSTY2-2010K-1587            | USA                              | CP016865.1               | CMY-2                             | Non-typeable <sup>j,k</sup>  | <i>S. Typhimurium</i> | 19                               |
| Human clinical                               | 2016                   | pMR0716_tem1 <sup>f</sup>   | Germany                          | CP018104.1               | TEM-1B-like                       | 12                           | <i>E. coli</i>        | 617                              |
| Human clinical                               | 2016                   | pMRSN346595_120.3           | USA                              | CP018110.1               | TEM-1B (IP 99.88%) <sup>i</sup>   | 12                           | <i>E. coli</i>        | 617                              |
| Human clinical                               | 2016                   | pMRSN346638_119.3           | USA                              | CP018116.1               | TEM-1B (IP 99.88%)                | 12                           | <i>E. coli</i>        | 617                              |
| Human clinical                               | 2016                   | pMRSN346355_120.3           | USA                              | CP018122.1               | TEM-1B (IP 99.88%)                | 12                           | <i>E. coli</i>        | 617                              |
| Ground turkey                                | 2011                   | - <sup>g</sup>              | USA                              | CP022064.2               | CMY-2-like                        | 12                           | <i>S. Typhimurium</i> | 19                               |
| N/A <sup>c</sup>                             | N/A <sup>c</sup>       | -                           | USA <sup>e</sup>                 | CP027127.1               | CMY-2                             | 12                           | <i>E. coli</i>        | 156                              |
| Human stool                                  | 2012                   | -                           | USA <sup>e</sup>                 | CP027415.1               | -                                 | 12                           | <i>S. Typhimurium</i> | 19                               |
| N/A                                          | N/A                    | pSTM709 DNA                 | Uruguay                          | HG428759.1               | CMY-2                             | 12                           | <i>S. Typhimurium</i> | N/A                              |
| Pig fecal material                           | 2005 <sup>d</sup>      | pESCR                       | France                           | KR494248.1               | CMY-2-CTX-M-1                     | 12                           | <i>E. coli</i>        | N/A                              |
| Air sac of turkey condemned by airsacculitis | N/A                    | pJB10                       | Brazil                           | KX452392.1               | CMY-2                             | Non-typeable <sup>j,k</sup>  | <i>E. coli</i>        | N/A                              |
| N/A                                          | N/A                    | RCS37_pII                   | France <sup>e</sup>              | LT985231.1               | SHV-12                            | 178 <sup>k</sup>             | <i>E. coli</i>        | N/A                              |
| Hatchery, free range broiler                 | 2010-2011 <sup>e</sup> | p343-2                      | France                           | MG692703.1               | CMY-2                             | 12                           | <i>E. coli</i>        | N/A                              |
| Hatchery, free range broiler                 | 2010-2011 <sup>e</sup> | p368-6                      | France                           | MG692704.1               | CMY-2                             | 12                           | <i>E. coli</i>        | N/A                              |
| Hatchery, free range broiler                 | 2010-2011 <sup>e</sup> | p492-9                      | France                           | MG692706.1               | CMY-2                             | 12                           | <i>E. coli</i>        | N/A                              |
| Hatchery, free range broiler                 | 2010-2011 <sup>e</sup> | p482-1                      | France                           | MG692709.1               | CMY-2                             | 12                           | <i>E. coli</i>        | N/A                              |
| Hatchery, free range broiler                 | 2010-2011 <sup>e</sup> | p506-5                      | France                           | MG692734.1               | CMY-2                             | 12                           | <i>E. coli</i>        | N/A                              |

|                               |                        |                    |                    |            |          |                             |                        |      |
|-------------------------------|------------------------|--------------------|--------------------|------------|----------|-----------------------------|------------------------|------|
| Hatchery, free range broiler  | 2010-2011 <sup>e</sup> | p481-4             | France             | MG692735.1 | CMY-2    | 12                          | <i>E. coli</i>         | N/A  |
| Hatchery, free range broiler  | 2010-2011 <sup>e</sup> | p508-1             | France             | MG692738.1 | CMY-2    | Non-typeable <sup>j,k</sup> | <i>E. coli</i>         | N/A  |
| Hatchery, free range broiler  | 2010-2011 <sup>e</sup> | p508-3             | France             | MG692740.1 | CMY-2    | Non-typeable <sup>j,k</sup> | <i>E. coli</i>         | N/A  |
| Chicken                       | N/A                    | p1108-CMY2         | China <sup>e</sup> | MG825376.1 | CMY-2    | 12                          | <i>E. coli</i>         | N/A  |
| Human stool                   | 1999                   | pFORC11.2          | South Korea        | CP010831.1 | -        | 230 <sup>1</sup>            | <i>Shigella sonnei</i> | 152  |
| Human                         | N/A                    | -                  | USA                | CP018774.2 | TEM-1A   | 270 <sup>1</sup>            | <i>E. coli</i>         | 2732 |
| Human                         | 2015                   | -                  | USA                | CP019905.1 | SHV-12   | 231                         | <i>E. coli</i>         | 117  |
| Human diabetic foot infection | 2016                   | pICBEC72Hctx       | Brazil             | KX443694.1 | CTX-M-8  | 131 <sup>1</sup>            | <i>E. coli</i>         | N/A  |
| Fecal swab                    | N/A                    | pV404              | Bolivia            | LM651376.1 | CTX-M-14 | 107 <sup>1</sup>            | <i>E. coli</i>         | N/A  |
| Canine                        | 2003                   | pCVM22462          | USA                | CP009566.1 | CMY-2    | 23                          | <i>S. Newport</i>      | 45   |
| Chicken cecal content         | 2009                   | pSA01AB09084001_92 | Canada             | CP016533.1 | CMY-2    | 2                           | <i>S. Heidelberg</i>   | 15   |
| Canine                        | 2002                   | p95                | Scotland           | CP023356.1 | CMY-2    | 2                           | <i>E. coli</i>         | 963  |
| Canine                        | 2002                   | p92                | Scotland           | CP023365.1 | CMY-2    | 2                           | <i>E. coli</i>         | 38   |
| Canine                        | 2002                   | p92                | Scotland           | CP023376.1 | CMY-2    | 2                           | <i>E. coli</i>         | 10   |
| Canine                        | 2002                   | p95                | Scotland           | CP023382.1 | CMY-2    | 2                           | <i>E. coli</i>         | 46   |
| Canine                        | 2002                   | p87                | Scotland           | CP023385.1 | CMY-2    | 23                          | <i>E. coli</i>         | 744  |
| N/A                           | N/A                    | tig00000311        | N/A <sup>c</sup>   | CP024854.1 | CMY-2    | 23                          | <i>E. coli</i>         | 405  |
| N/A                           | N/A                    | -                  | N/A                | CP027535.1 | CMY-2    | 20                          | <i>E. coli</i>         | 131  |
| N/A                           | N/A                    | pJIE512b           | Australia          | HG970648.1 | CMY-2    | 2                           | <i>E. coli</i>         | N/A  |
| Canine                        | 2008                   | pR7AC              | Denmark            | KF434766.1 | CMY-2    | 2                           | <i>E. coli</i>         | 297  |
| Human urine                   | 2009                   | pC-6               | Denmark            | KT186369.1 | CMY-2    | 2                           | <i>E. coli</i>         | 657  |
| Food                          | 2006                   | pS10584            | China              | KX058576.1 | CMY-2    | 265                         | <i>S. enterica</i>     | N/A  |
| Chicken                       | 2011                   | pCAZ590            | Germany            | LT669764.1 | SHV-12   | 95                          | <i>E. coli</i>         | N/A  |

<sup>a</sup> Included plasmid sequences from GenBank had a Query Coverage value of 100% and Identity value  $\geq 99\%$  in relation to the concatenated fasta files of IncI1-I $\gamma$ /ST12 or ST231

<sup>b</sup> Only plasmids from IncI1-I $\gamma$ /ST12, ST12-SLVs, ST231 or ST231-SLVs and/or carrying CMY-2 or SHV-12 are displayed

<sup>c</sup> N/A = data not available in Genbank

<sup>d</sup> Year of isolation was personally informed by Dr. Isabelle Kempf from the French Agency for Food, Environmental and Occupational Health & Safety (ANSES), France

<sup>e</sup> Data taken from information accompanying the sequence submission in GenBank but not specifically found in the metadata fields

<sup>f</sup> Excluded prior phylogenetic analysis due to large discrepancies in the sequence size

<sup>g</sup> - = Unnamed plasmids

<sup>h</sup> - = no ESBL/pAmpC genes were detected

<sup>i</sup> IP = Identity percentage

<sup>j</sup> This plasmid missed or provide no exact match to one of the alleles in the pMLST scheme

<sup>k</sup> Single-locus variant of IncI1-I $\gamma$ /ST12 or <sup>l</sup> IncI1-I $\gamma$ /ST231

<sup>m</sup> N/A = MLST information is not available for this strain

**(C) IncI1-Iy plasmids from previous publications from Europe**

| Source                             | Year | Plasmid Name | Country of Origin | Biosample /ENA Accession Number <sup>a,b</sup> | ESBL/pAmpC Enzymes | IncI1 pMLST | Bacterial Host | Bacterial Host MLST |
|------------------------------------|------|--------------|-------------------|------------------------------------------------|--------------------|-------------|----------------|---------------------|
| Chicken meat                       | 2007 | pESBL-355    | Netherlands       | SAMN03168488 <sup>a</sup>                      | CMY-2              | 12          | <i>E. coli</i> | 117                 |
| Chicken cecal content at slaughter | 2008 | pESBL-318    | Netherlands       | SAMN03168487                                   | CMY-2              | 12          | <i>E. coli</i> | 117                 |
| Broiler meat                       | 2010 | p1061-1      | Denmark           | ERR915115 <sup>b</sup>                         | CMY-2              | 12          | <i>E. coli</i> | 10                  |
| Broiler flock feces                | 2010 | p5498-4      | Denmark           | ERR915116                                      | CMY-2              | 12          | <i>E. coli</i> | 212                 |
| Parental broiler flock feces       | 2011 | p2028-7      | Denmark           | ERR915117                                      | CMY-2              | 12          | <i>E. coli</i> | 745                 |
| Human urine clinical               | 2011 | pC-20        | Denmark           | ERR915118                                      | CMY-2              | 12          | <i>E. coli</i> | 155                 |
| Broiler flock faces                | 2010 | p7077-60     | Denmark           | ERR915119                                      | CMY-2              | 12          | <i>E. coli</i> | 410                 |
| Parental broiler flock feces       | 2011 | p2123-1      | Denmark           | ERR915120                                      | CMY-2              | 12          | <i>E. coli</i> | 350                 |
| Parental broiler flock feces       | 2011 | p2028-14     | Denmark           | ERR915121                                      | CMY-2              | 12          | <i>E. coli</i> | 3272                |
| Parental broiler flock feces       | 2011 | p2067-1      | Denmark           | ERR915122                                      | CMY-2              | 12          | <i>E. coli</i> | 88                  |
| Parental broiler flock feces       | 2011 | p2054-6      | Denmark           | ERR915123                                      | CMY-2              | 12          | <i>E. coli</i> | 206                 |
| Parental broiler flock feces       | 2011 | p2028-10     | Denmark           | ERR915124                                      | CMY-2              | 12          | <i>E. coli</i> | 1303                |

<sup>a</sup> Plasmid sequences from the Netherlands have no accession number assigned. They were provided by Wageningen Bioveterinary Research (WBVR), the Netherlands

<sup>b</sup> Plasmid sequences from Denmark were inferred after assembling the reads available in the ENA



**Fig. S1. Core genome (40056 bp) phylogenetic tree including plasmids from IncI1-I $\gamma$ /ST12 and its SLVs from Colombian poultry, previous publications and all plasmids obtained from GenBank using the concatenated alleles of IncI1-I $\gamma$ /ST12.**

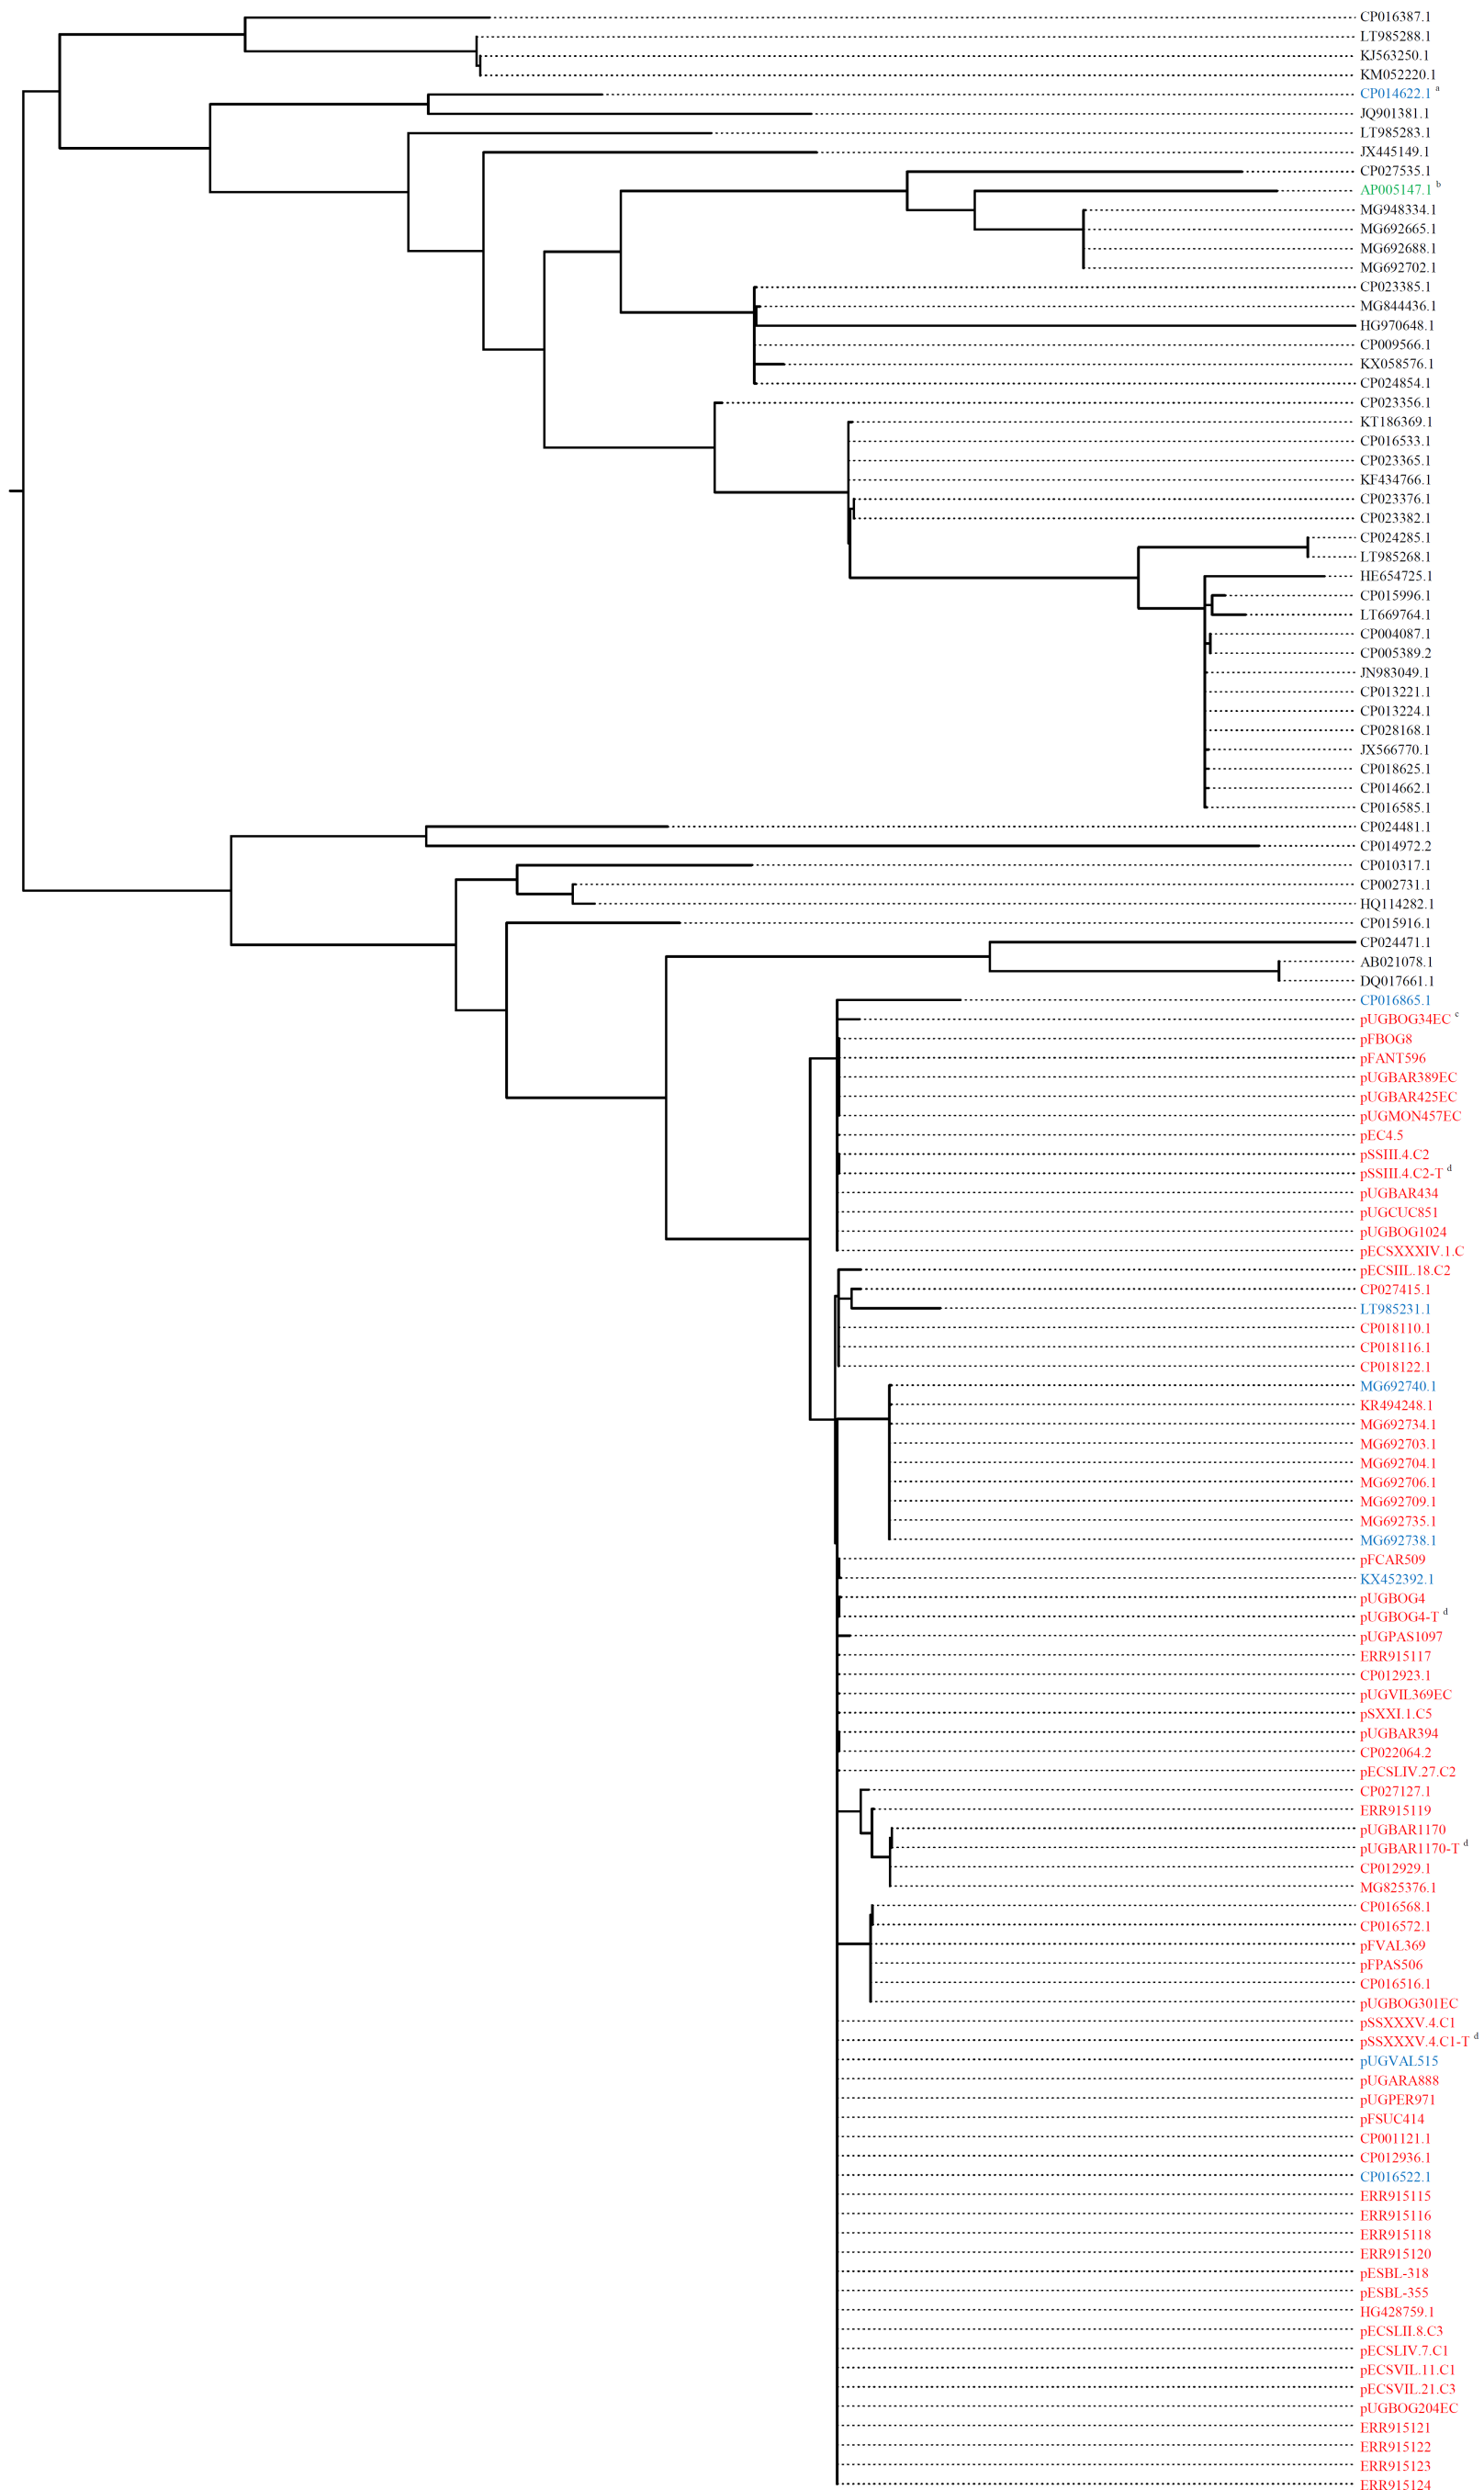

0.05

**Footnotes for Fig. S1**

**<sup>a</sup> Plasmids with their names in blue color belong to Single-Locus Variants (SLVs) of ST12**

**<sup>b</sup> Plasmid R64 with its name in green color and included as reference**

**<sup>c</sup> Plasmids with their names in red color belong to ST12**

**<sup>d</sup> Plasmid from Colombian *S. enterica* transformed into *E. coli* DH10B and included as reference**

**Scale bar represents nucleotide substitutions per site**

**Fig. S2. Gene presence/absence phylogenetic tree including plasmids from IncI1-Iγ/ST12 and its SLVs from Colombian poultry, previous publications and all plasmids obtained from GenBank using the concatenated alleles of IncI1-Iγ/ST12.**

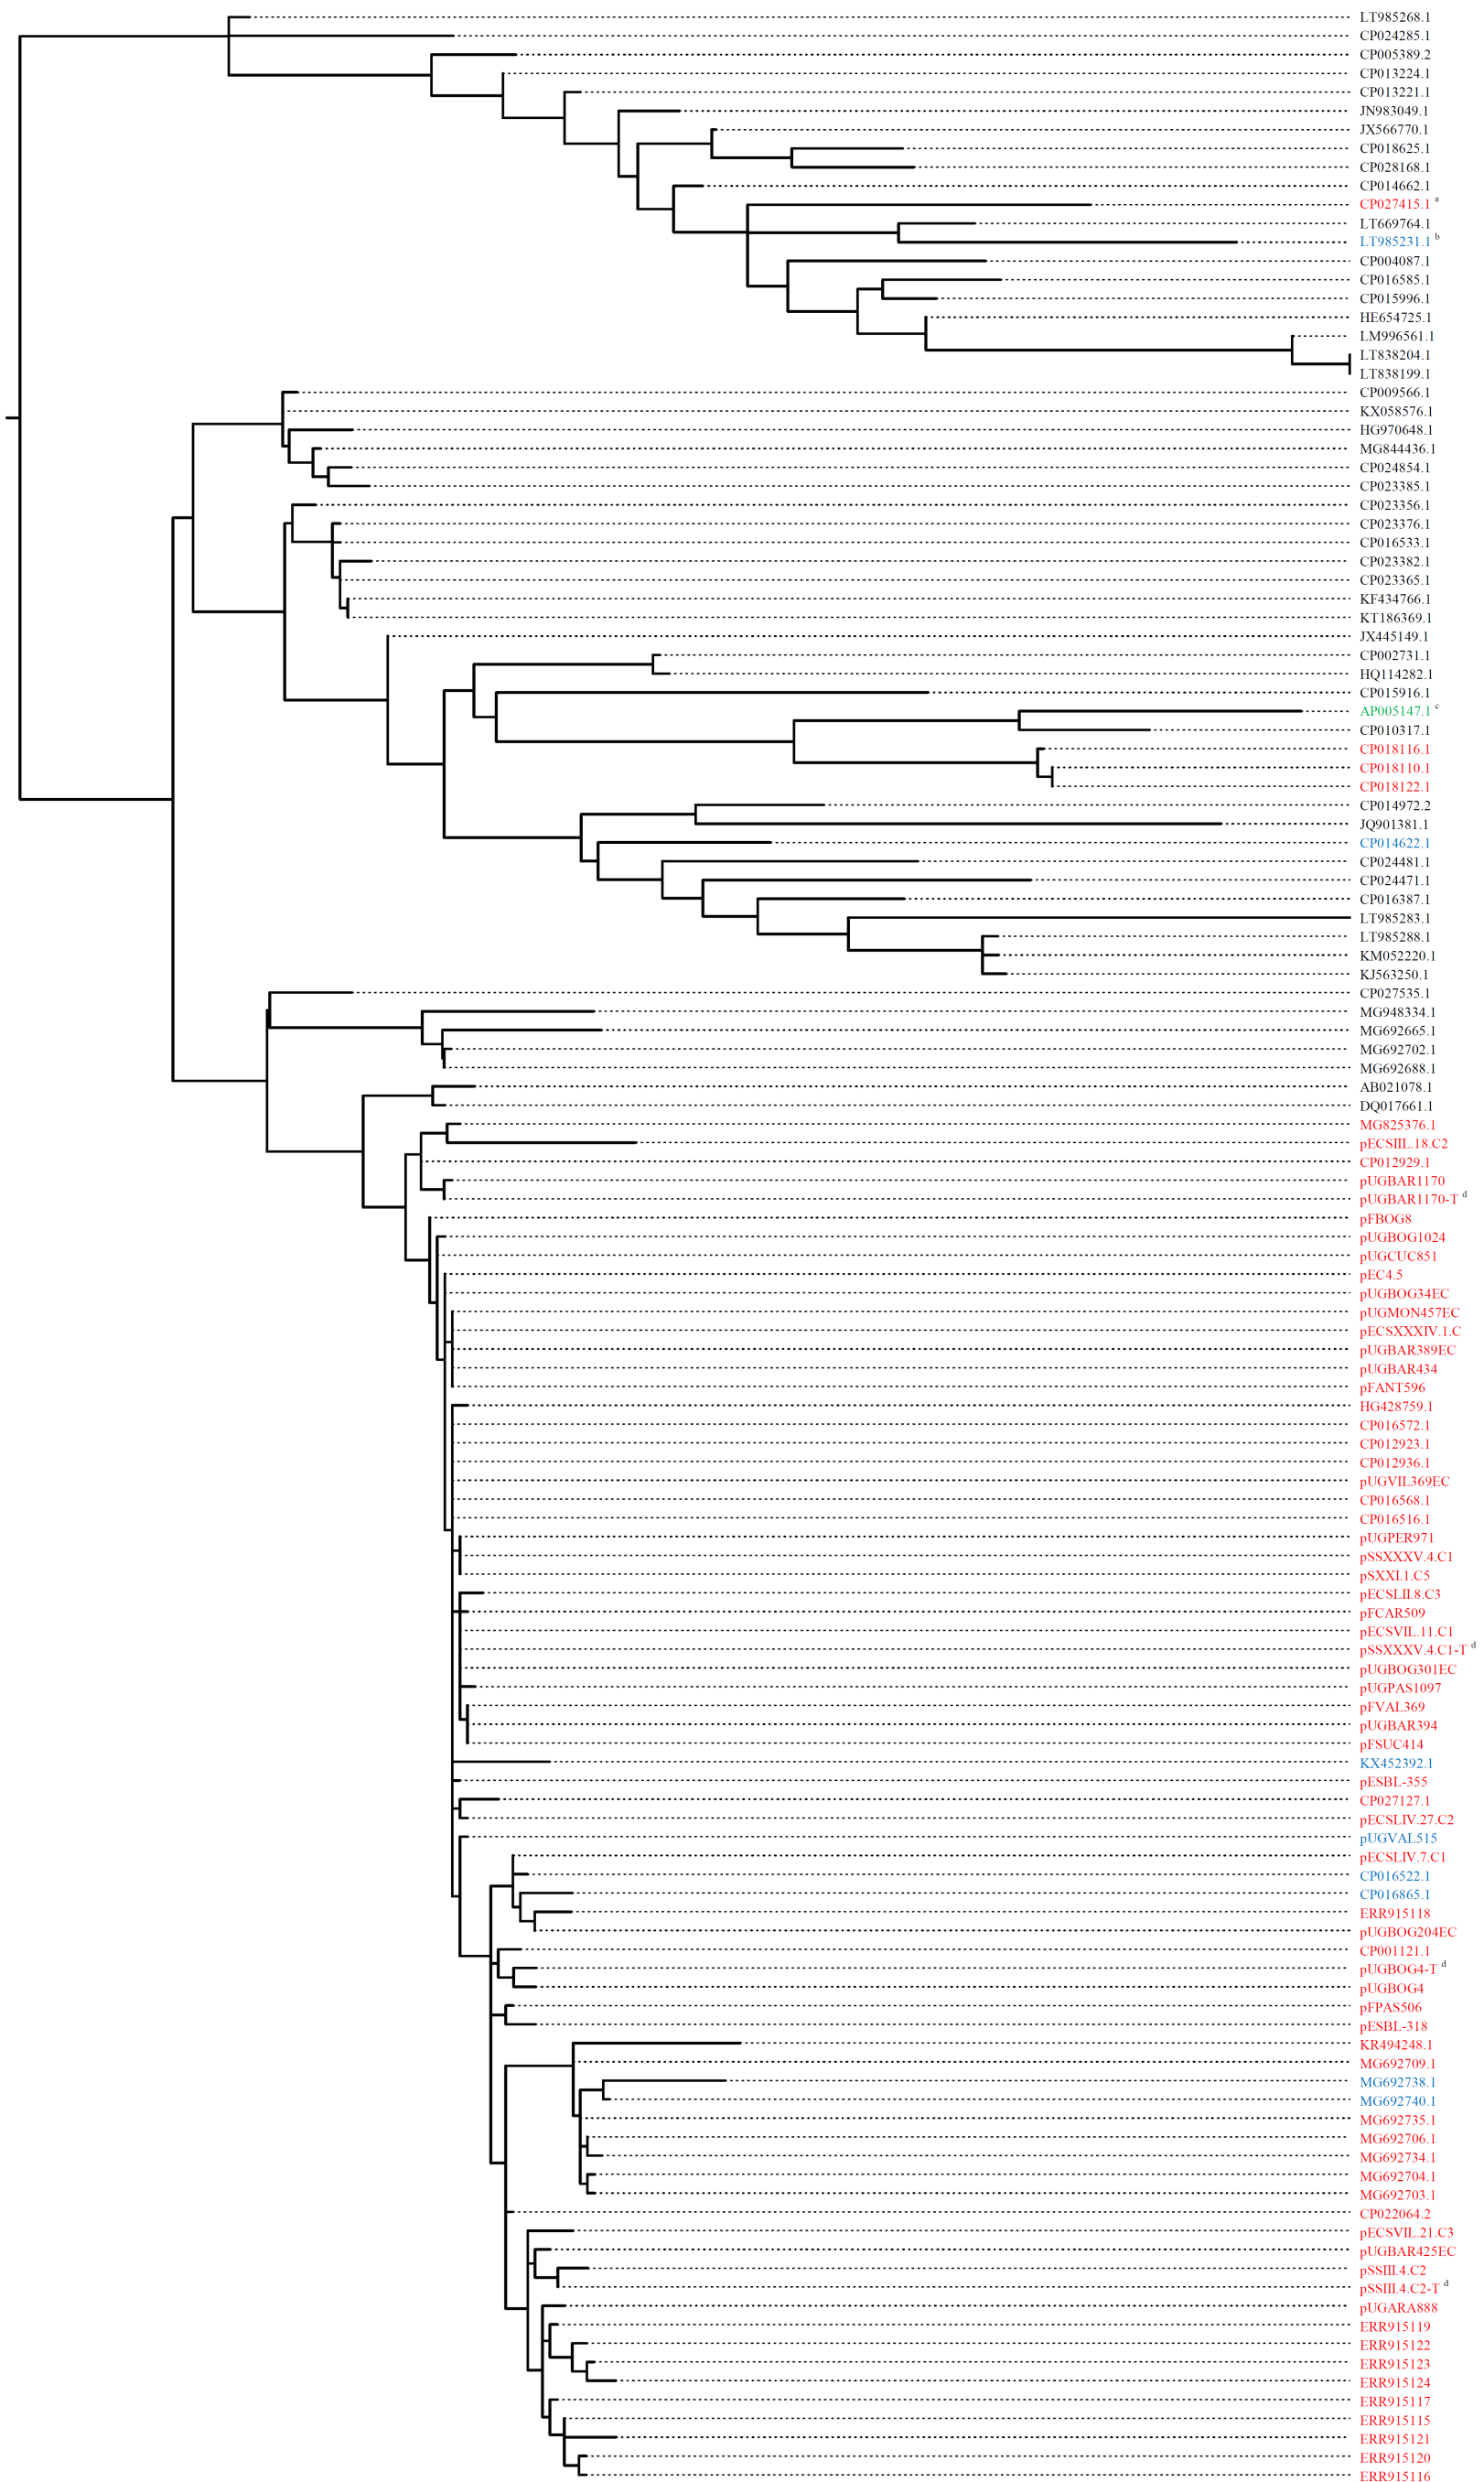

**Footnotes for Fig. S2**

**<sup>a</sup> Plasmids with their names in red color belong to ST12**

**<sup>b</sup> Plasmids with their names in blue color belong to Single-Locus Variants (SLVs) of ST12**

**<sup>c</sup> Plasmid R64 with its name in green color and included as reference**

**<sup>d</sup> Plasmid from Colombian *S. enterica* transformed into *E. coli* DH10B and included as reference**

**Scale bar represents distance in number of genes**

**Fig. S3. Patterns of genetic environment found repeatedly in (A) *bla*<sub>CMY-2</sub>-carrying plasmids from ST12 and its SLVs and (B) *bla*<sub>SHV-12</sub>-carrying plasmids from ST231.**

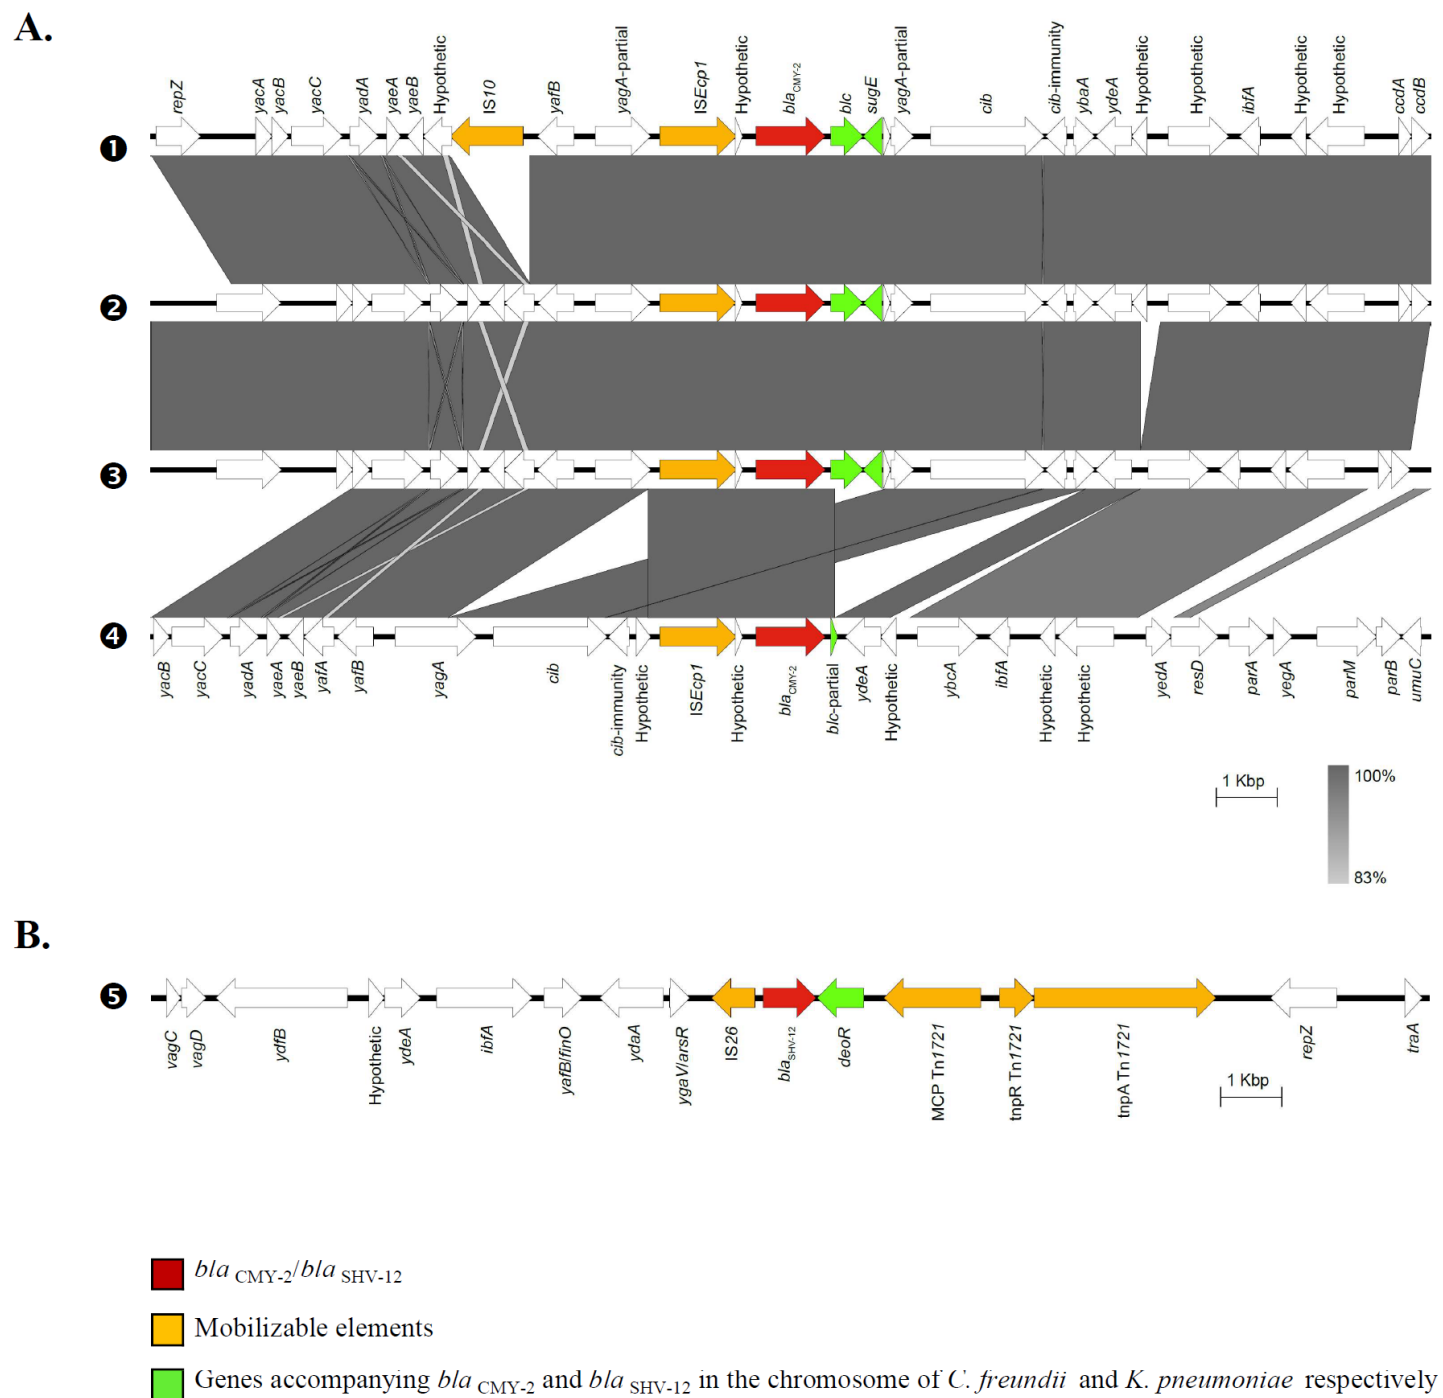

**NCBI RefSeq ID (A): Common genes surrounding *bla*<sub>CMY-2</sub> in IncI1-I $\gamma$ /ST12 plasmids and SLVs.**

*yacA* (WP\_000079941.1); *yacB* (WP\_032072246.1); *yacC* (WP\_001057991.1); *yadA* (WP\_001334658.1); *yaeA* (WP\_001334656.1); *yafB* (WP\_000517695.1); *yagA* (WP\_001132032.1); *ISEcp1* (WP\_000608644.1); *blc* (WP\_001221666.1); *sugE* (P\_000118520.1); *yagA* (partial sequences) (WP\_001132034.1 and EFU56748.1); *cib* (colicin 1B) (WP\_001283341.1); *cib* immunity protein (WP\_000762570.1); *ybaA* (WP\_000142436.1); *ydeA* (WP\_000194550.1); *ibfA* (WP\_000793307.1); *ccdA* (WP\_000813630.1); *ccdB* (WP\_001159871.1).

**NCBI RefSeq ID (B): Common genes surrounding *bla*<sub>SHV-12</sub> in IncI1-I $\gamma$ /ST231 plasmids and SLVs.**

*vagC* (WP\_001261287.1); *vagD* (WP\_001341418.1); *ydfB* (WP\_000350638.1); *ydeA* (WP\_000194575.1); *ibfA* (WP\_000818556.1); *yafB/finO* (WP\_000521603.1); *ydaA* (WP\_044502555.1); *ygaV/larsR* (WP\_001175593.1); *IS26* (WP\_001067855.1); *deoR* (WP\_002210513.1).

**Fig. S4. Genetic environment of *bla*<sub>CMY-2</sub> in (A) IS1294-associated plasmids CP009566.1 and KX058576.1 and (B) IS26-associated CP023365.1, KF434766.1 and KT186369.1**

**A.**

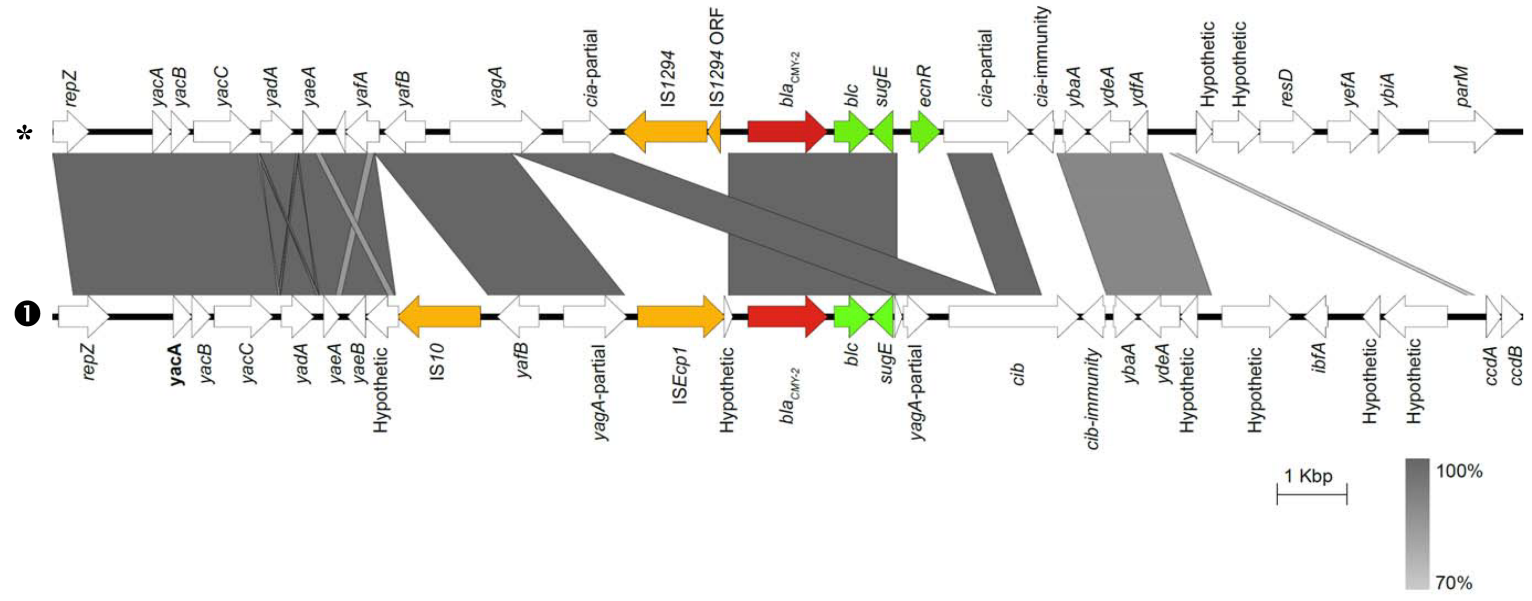

**B.**

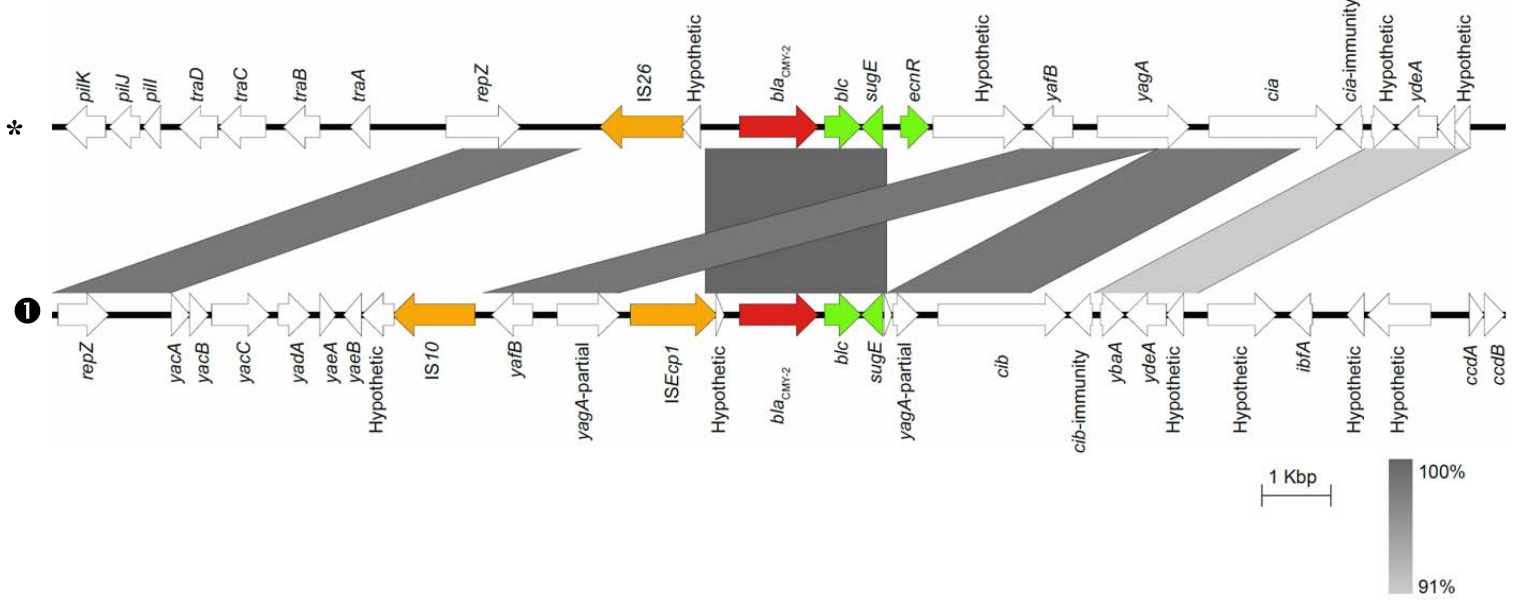

█ *bla*<sub>CMY-2</sub>

█ Mobilizable elements

█ Genes accompanying *bla*<sub>CMY-2</sub> in the chromosome of *C. freundii*

\* The genetic environment (20kb) was identical for CP009566.1 and KX058576.1 in (A) and for CP023365.1, KF434766.1 and KT186369.1 in (B)



**Fig. S5. Core genome (32789 bp) phylogenetic tree including plasmids from IncI1-I $\gamma$ /ST231 and its SLVs from Colombian poultry and all plasmids obtained from GenBank using the concatenated alleles of IncI1-I $\gamma$ /ST231.**

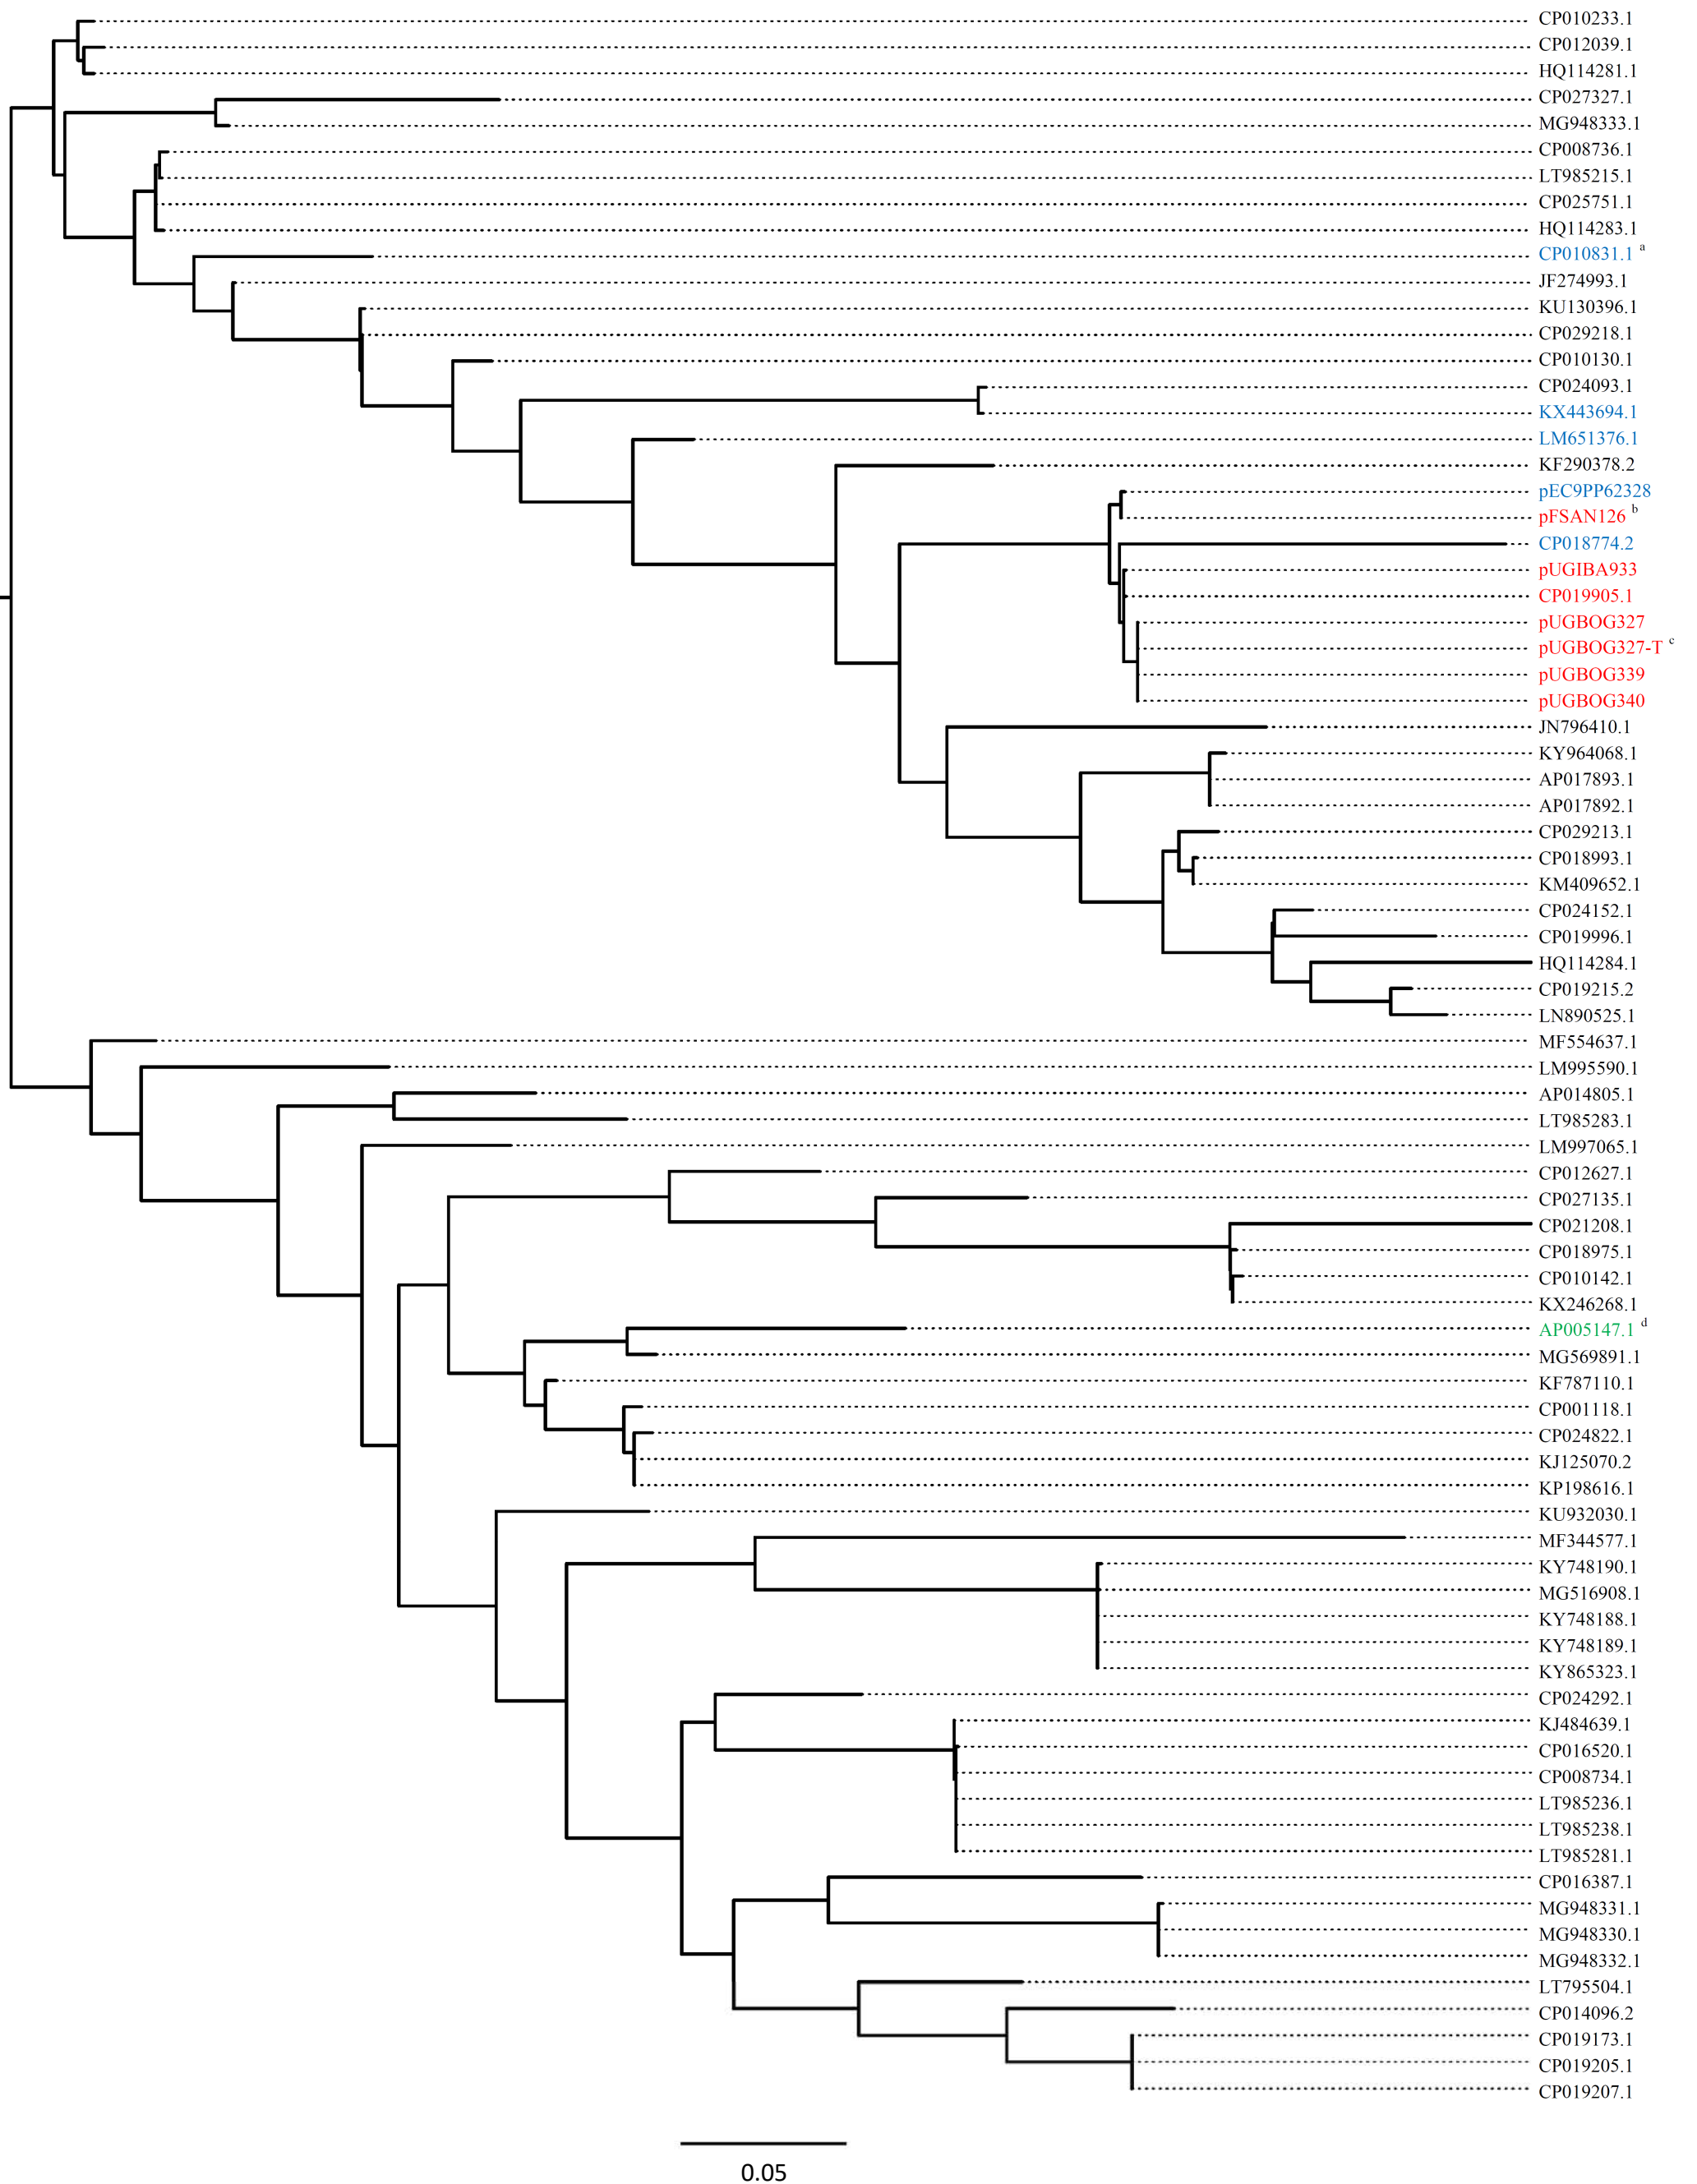

**Footnotes for Fig. S5**

**<sup>a</sup> Plasmids with their names in blue color belong to Single-Locus Variants (SLVs) of ST231**

**<sup>b</sup> Plasmids with their names in red color belong to ST231**

**<sup>c</sup> Plasmid from Colombian *S. enterica* transformed into *E. coli* DH10B and included as reference**

**<sup>d</sup> Plasmid R64 with its name in green color and included as reference**

**Scale bar represents nucleotide substitutions per site**



**Fig. S6. Gene presence/absence phylogenetic tree including plasmids from IncI1-I $\gamma$ /ST231 and its SLVs from Colombian poultry and all plasmids obtained from GenBank using the concatenated alleles of IncI1-I $\gamma$ /ST231.**

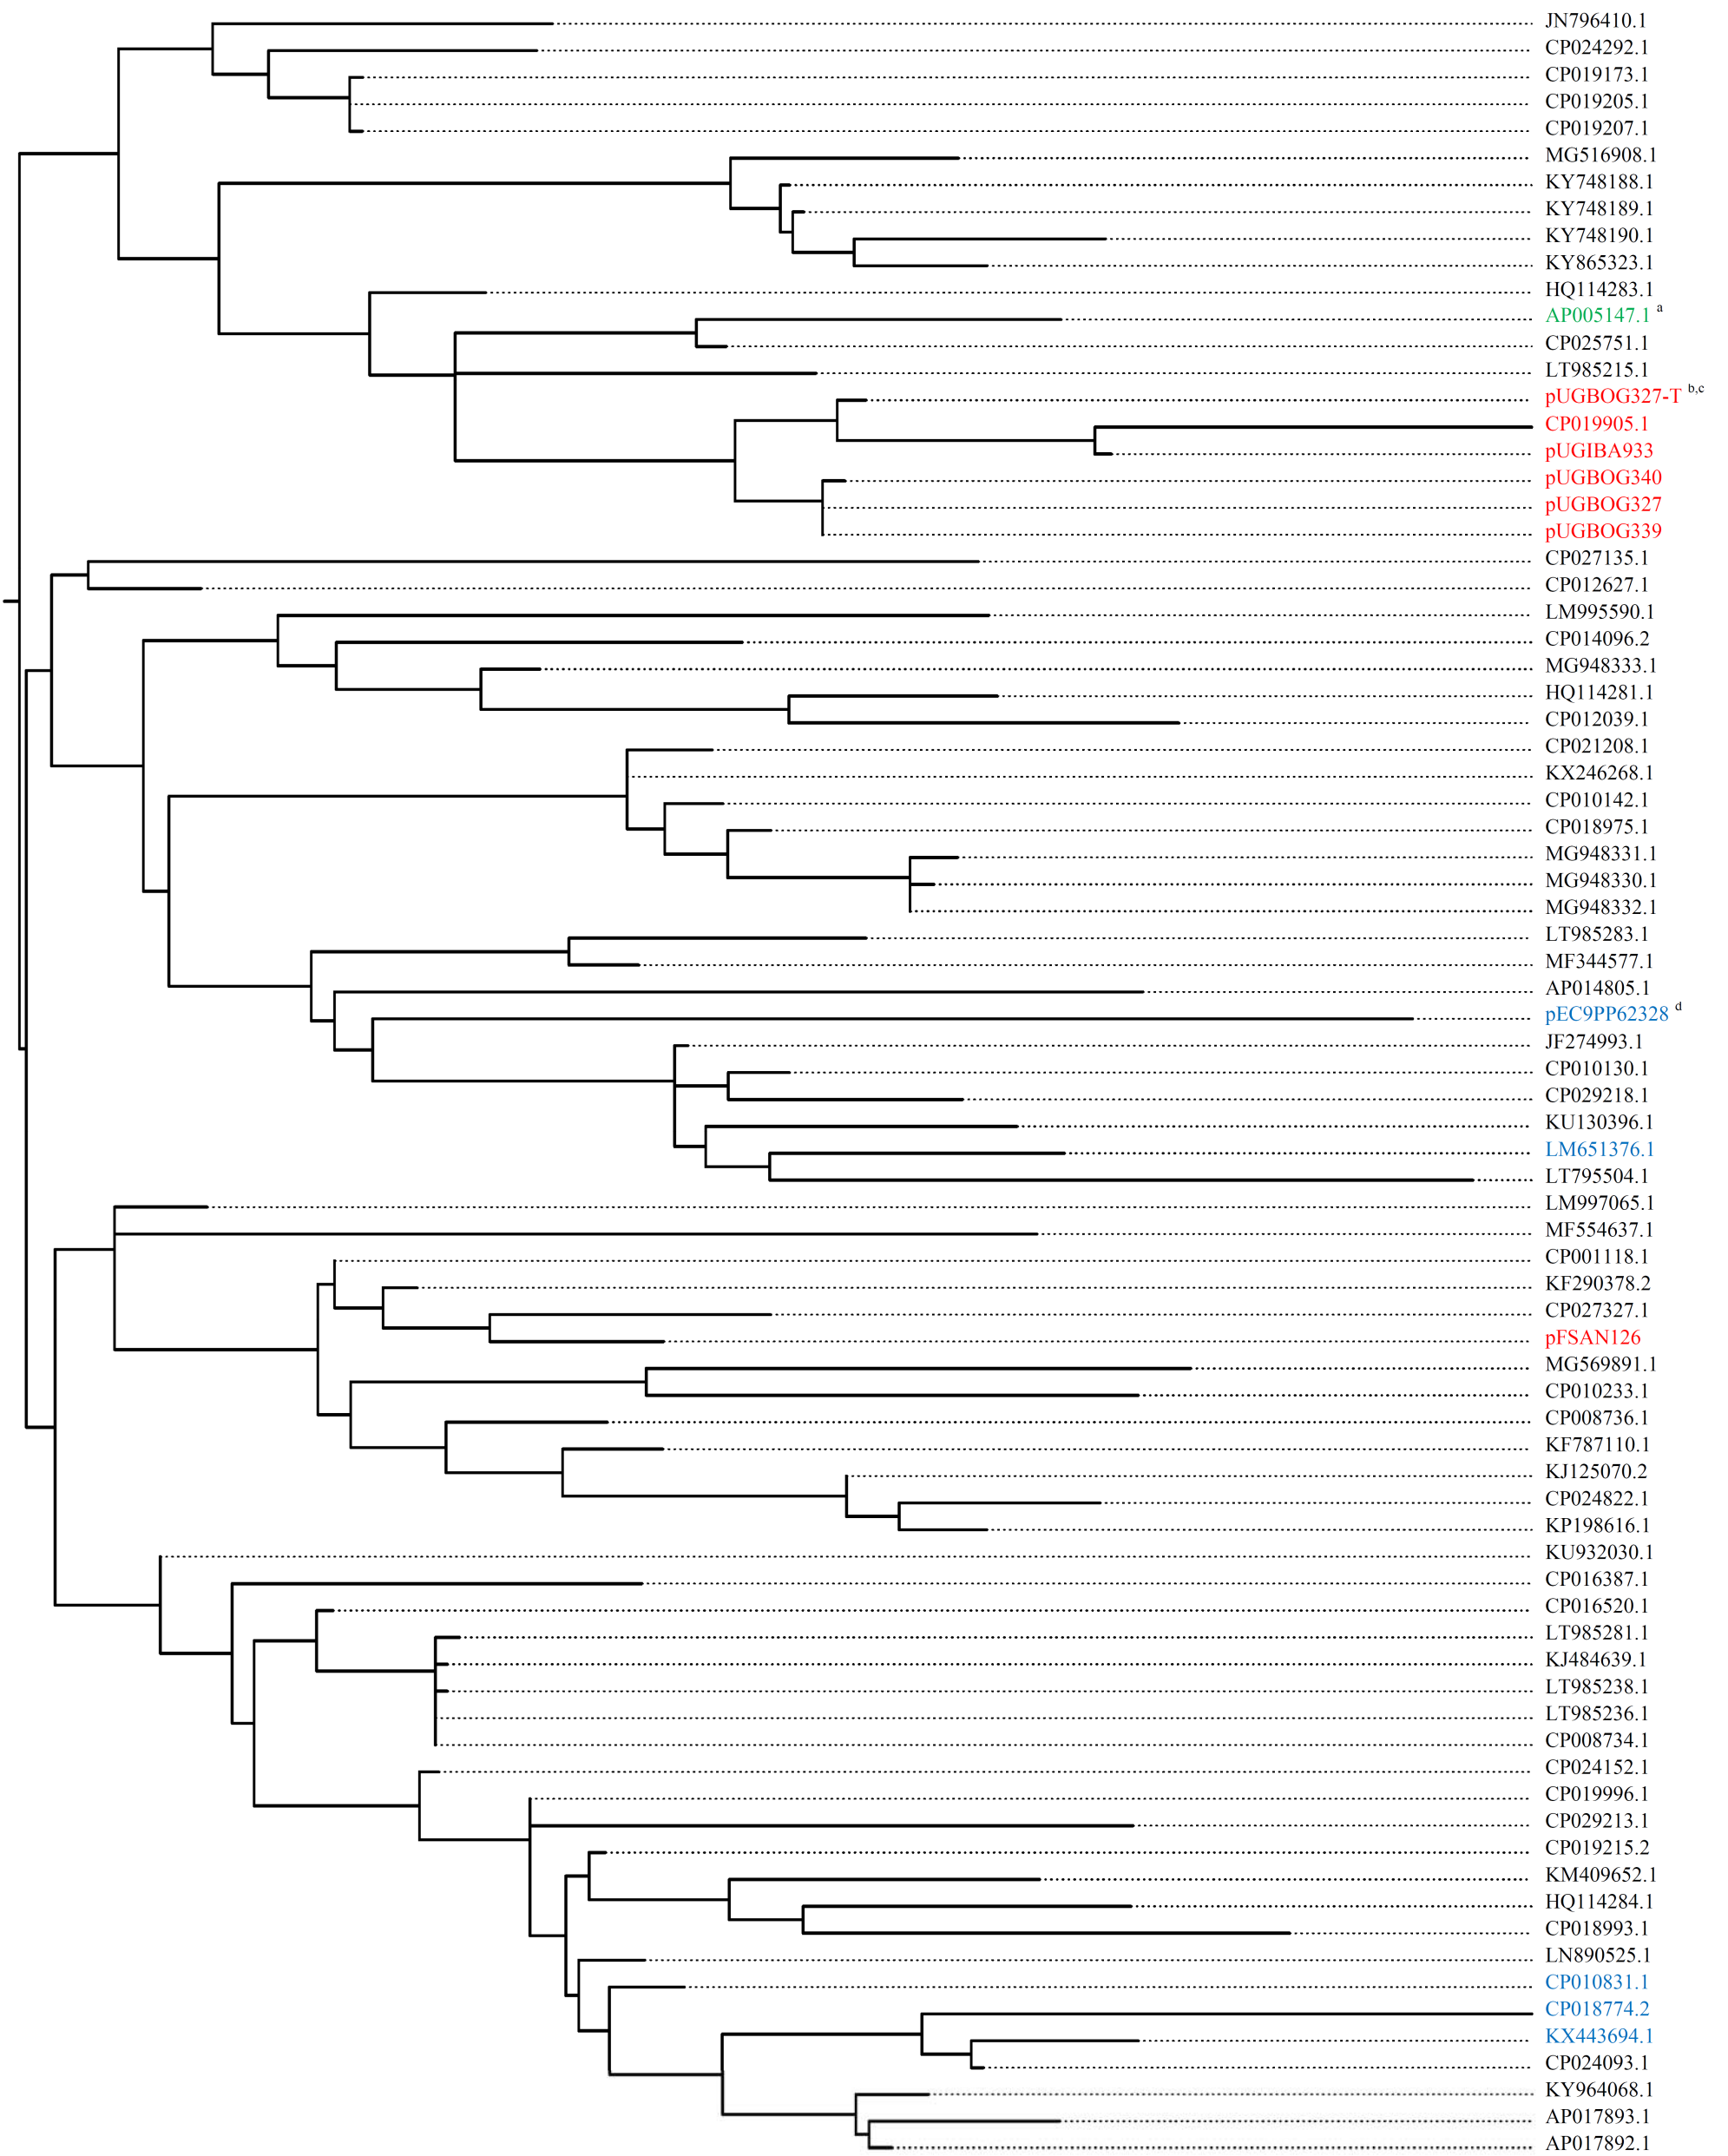

**Footnotes for Fig. S6**

**<sup>a</sup> Plasmid R64 with its name in green color and included as reference**

**<sup>b</sup> Plasmids with their names in red color belong to ST231**

**<sup>c</sup> Plasmid from Colombian *S. enterica* transformed into *E. coli* DH10B and included as reference**

**<sup>d</sup> Plasmids with their names in blue color belong to Single-Locus Variants (SLVs) of ST231**

**Scale bar represents distance in number of genes**

**Fig. S7. Differences in the genetic environment of *bla*<sub>SHV-12</sub> in plasmids CP019905.1 (ST231) and pEC9PP62328 (ST230).**

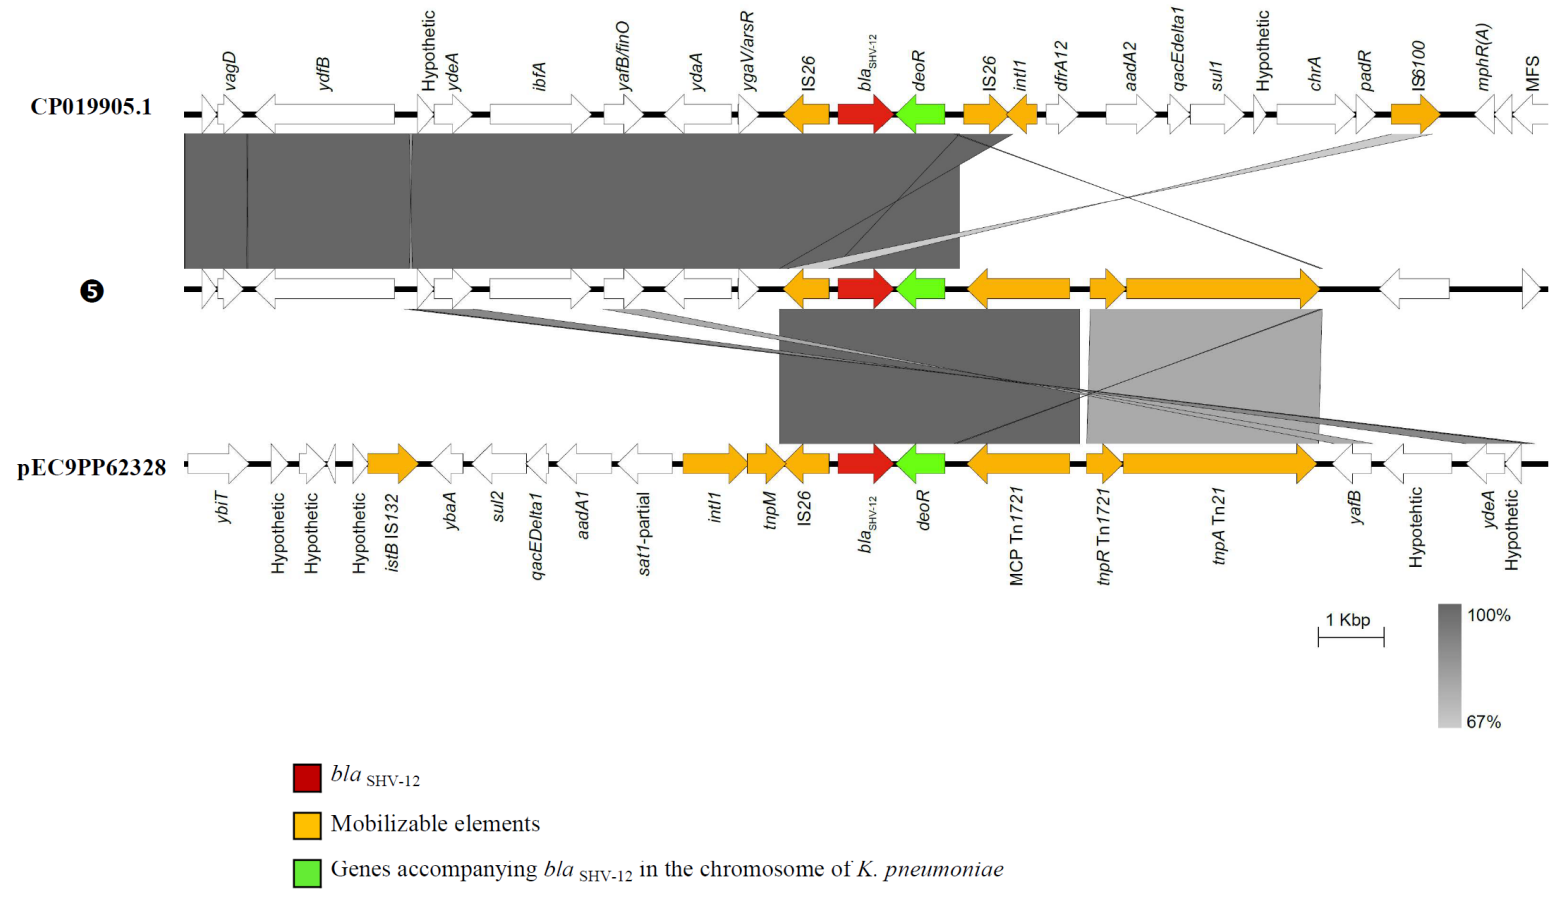

Supplement: AAC.02546-18-s0001.pdf [file AAC.02546-18-s0001.pdf]
